# Supplementary material
Source: HighWire-hosted journal article supplement (https://erj.ersjournals.com/content/56/1/2001645)
Supplement: inline-supplementary-material-1 [file inline-supplementary-material-1.pdf]

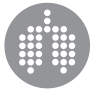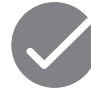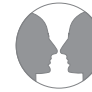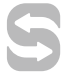

SHAREABLE PDF

# COVID-19 and vaping: risk for increased susceptibility to SARS-CoV-2 infection?

Kielan Darcy McAlinden<sup>1</sup>, Mathew Suji Eapen <sup>1</sup>, Wenying Lu<sup>1</sup>, Collin Chia<sup>1,2</sup>, Greg Haug<sup>1,2</sup> and Sukhwinder Singh Sohal<sup>1</sup>

**Affiliations:** <sup>1</sup>Respiratory Translational Research Group, Department of Laboratory Medicine, School of Health Sciences, College of Health and Medicine, University of Tasmania, Launceston, Australia. <sup>2</sup>Department of Respiratory Medicine, Launceston General Hospital, Launceston, Australia.

**Correspondence:** Sukhwinder Singh Sohal, Respiratory Translational Research Group, Department of Laboratory Medicine, School of Health Sciences, College of Health and Medicine, University of Tasmania, Locked Bag – 1322, Newnham Drive, Launceston, Tasmania 7248, Australia. E-mail: sssohal@utas.edu.au

 @ERSpublications

**Absolute cessation of any tobacco product in any form: implications for COVID-19** <https://bit.ly/3cyk9ra>

**Cite this article as:** McAlinden KD, Eapen MS, Lu W, *et al.* COVID-19 and vaping: risk for increased susceptibility to SARS-CoV-2 infection?. *Eur Respir J* 2020; 56: 2001645 [<https://doi.org/10.1183/13993003.01645-2020>].

This single-page version can be shared freely online.

*To the Editor:*

With great interest we read and commend the study done by Russo *et al.* [1], highlighting their findings that nicotine induces an increase in angiotensin-converting enzyme 2 (ACE-2) expression in human bronchial epithelial cells (HBEpC) and is mediated by  $\alpha 7$ -subtype nicotinic receptors ( $\alpha 7$ -nAChR). It raises the concern that all electronic nicotine-delivery systems may put users at greater risk of succumbing to coronavirus disease 2019 (COVID-19).
